# Supplementary material for: Oblongifolin M, an active compound isolated from a Chinese medical herb Garcinia oblongifolia, potently inhibits enterovirus 71 reproduction through downregulation of ERp57
Source: PubMed Central journal article supplement (PMC4891005; doi:10.18632/oncotarget.7122), 2016-02-01
Supplement: oncotarget-07-8797-s001.pdf [file oncotarget-07-8797-s001.pdf]

**SUPPLEMENTARY TABLE****Supplementary Table S1: Antiviral activity of OM against EV71 (strain; SHZH98), MOI of 1**

| Testing compound | CC <sub>50</sub> <sup>a</sup> ( $\mu$ M) | IC <sub>50</sub> <sup>b</sup> ( $\mu$ M) | IC <sub>90</sub> <sup>c</sup> ( $\mu$ M) | SI <sup>c</sup> |
|------------------|------------------------------------------|------------------------------------------|------------------------------------------|-----------------|
| OM               | 86.60 $\pm$ 1.68 <sup>d</sup>            | 17.55 $\pm$ 1.39 <sup>d</sup>            | 24.72 $\pm$ 0.20 <sup>d</sup>            | 4.93            |

<sup>a</sup>Cytotoxicity (CC50) was determined by MTT assay on RD cells at 24h.

<sup>b</sup>Antiviral activity (IC<sub>50</sub>) was tested by real-time PCR assay to quantify the intracellular viral RNA level on RD cells at MOI of 1, p.i. 12h.

<sup>c</sup>Selectivity Index (SI) is the ratio of CC50 to IC50.

<sup>d</sup>Values represent the mean  $\pm$ SD of three independent experiments.
